# Supplementary material for: AI Performance on Image-based Medical Case Scenarios: A Cross-Sectional Comparative Study
Source: Research Square preprint supplement (doi:10.21203/rs.3.rs-8096665/v1), 2025-12-13
Supplement: Supplementary file 1 [file 193f42a671adcd090f3efbfd.docx]

**Subjective Questions Assessment Scoring Table**

| Sub-question No.  Question No. | （1） | （2） | （3） | （4） | （5） | Total score |
| --- | --- | --- | --- | --- | --- | --- |
| 1 |  |  |  |  |  |  |
| 2 |  |  |  |  |  |  |
| 3 |  |  |  |  |  |  |
| 4 |  |  |  |  |  |  |
| 5 |  |  |  |  |  |  |
| ... |  |  |  |  |  |  |
| ... |  |  |  |  |  |  |

*Each subjective image-based scenario question consists of several sub-questions (range from 1 to 5), with each sub-question worth 10 points. The total score for the scenario is the sum of the scores for all sub-questions.

**Scoring System (0–10 points)**

| Score | Description |
| --- | --- |
| 10 | Fully meets the expected standard according to evaluator judgment |
| 0 | Does not meet the expected standard at all |
| 1–9 | Assigned at the evaluator’s discretion based on overall judgment of partial fulfillment |
